# Supplementary material
Source: Springer Nature journal article supplement (https://www.springerprofessional.de/resource/supplementary/13638_2012_581_MOESM3_ESM.pdf/11898652)

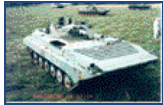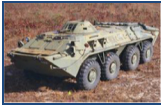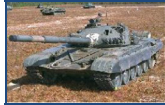

(a)

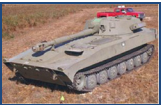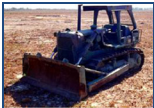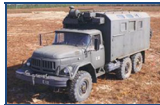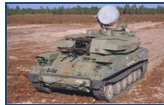

(b)

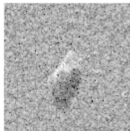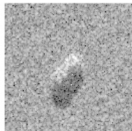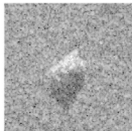

(c)

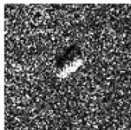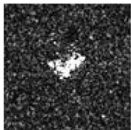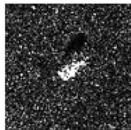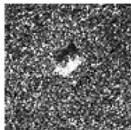

(d)

Supplement: MOESM3 [file 11898652]
